# Supplementary material for: A polyacrylamide–chitosan semi-interpenetrating self-healing network with embedded Keplerate {Mo132} for pH-controlled release of Eu-fluorescent tags
Source: Royal Society of Chemistry journal article supplement (doi:10.1039/d3nj03041e), 2023-01-01
Supplement: d3nj03041e1.pdf [file d3nj03041e1.pdf]

## Supporting Information

### **Polyacrylamide-Chitosan semi-interpenetrating self-healing network with embedded Keplerate {Mo<sub>132</sub>} for pH-controlled release of Eu-fluorescent tag**

Kirill Grzhegorzhevskii<sup>a,b\*</sup>, Ekaterina Rudakova<sup>a</sup>, Alexey Krinochkin<sup>a,b</sup>, Dmitry Kopchuk<sup>a,b</sup>, Yaroslav Shtaitz<sup>a,b</sup>, Lidia Adamova<sup>a</sup>, Grigory Kim<sup>a,b</sup>, Elena Rusinova<sup>a</sup> and Alisa Shmidt<sup>a</sup>

<sup>a</sup>*Ural Federal University named after the first President of Russia B.N. Yeltsin, 19 Mira str., 620002, Ekaterinburg, Russia*

<sup>b</sup>*I. Ya. Postovsky Institute of Organic Synthesis, Ural branch of RAS, 22/20 S. Kovalevskoy/Akademicheskaya str., 620990, Ekaterinburg, Russia*

\* *Corresponded author: kirillvalentinovich@urfu.ru*

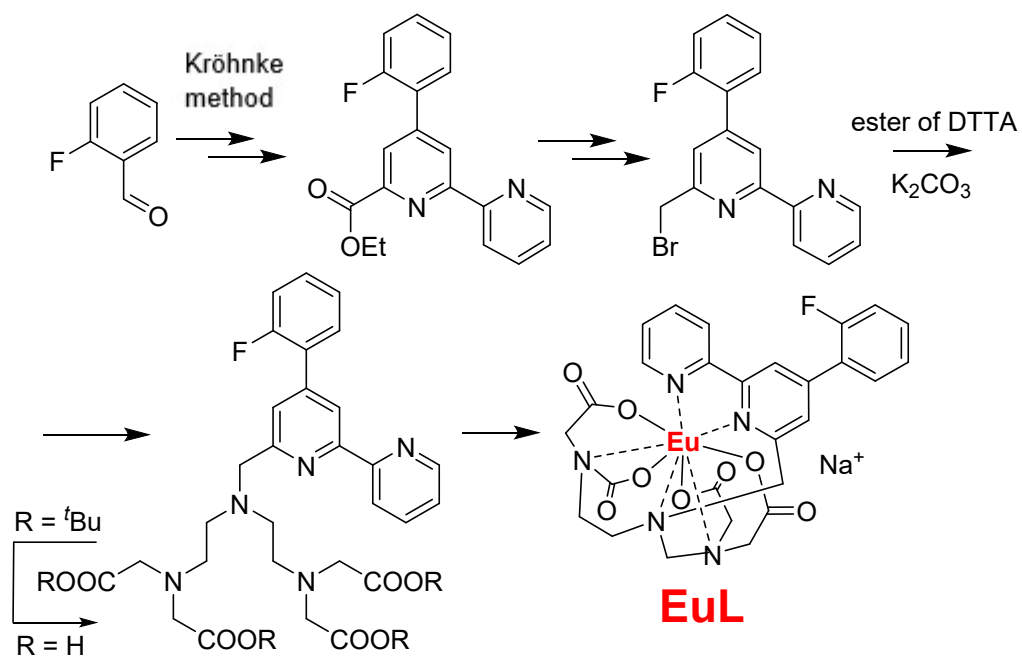

**Scheme S1.** General scheme for the synthesis of the complex Eu<sup>III</sup>L.

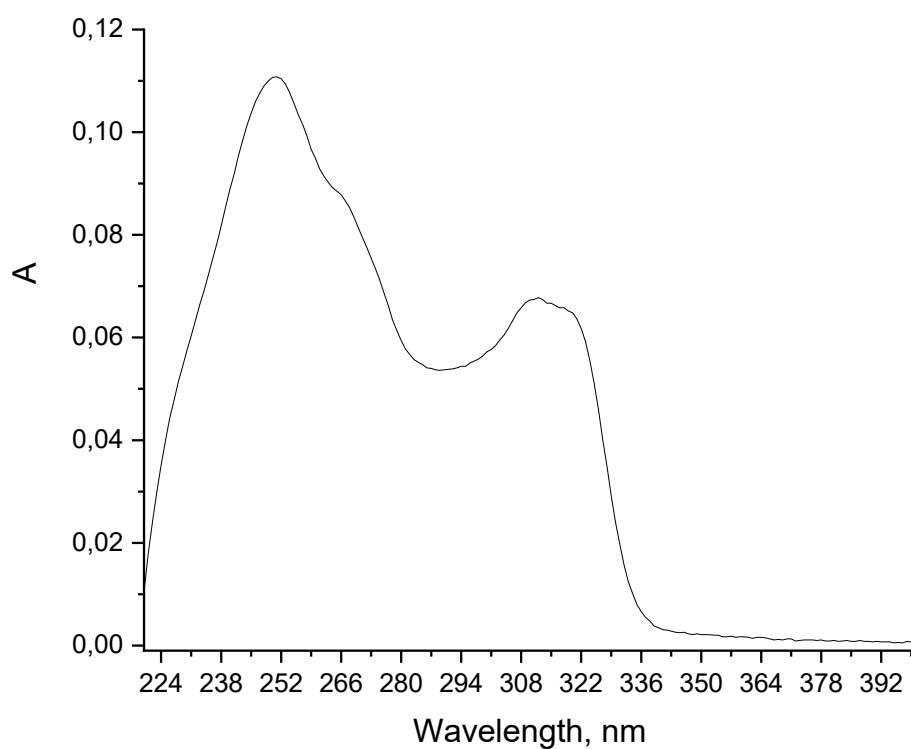

**Figure S1.** Absorption spectrum of Eu<sup>III</sup>L in water at room temperature.

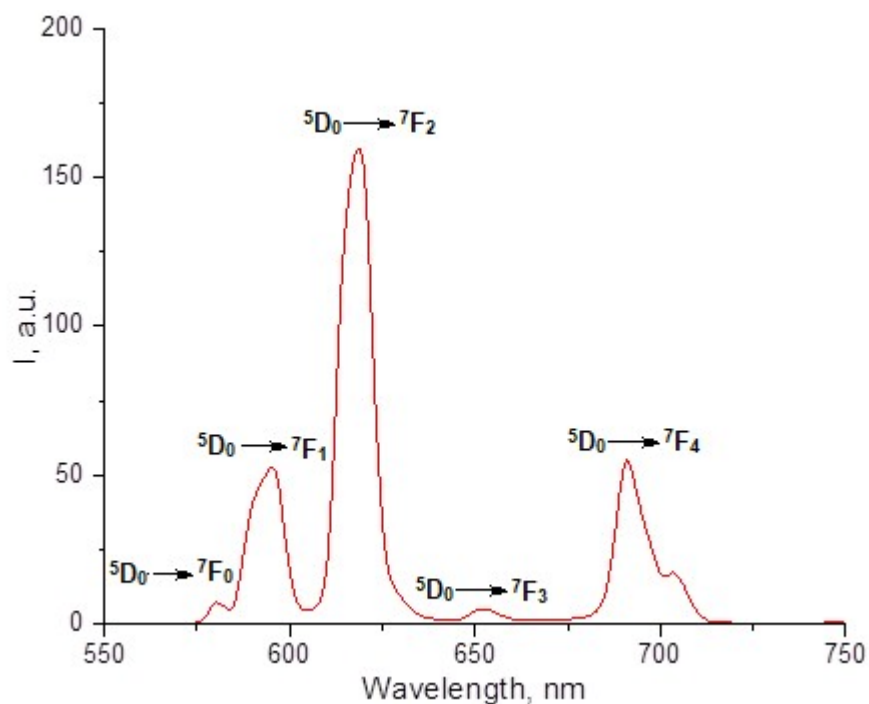

**Figure S2.** Europium(III) cation luminescence spectrum of complex  $\text{Eu}^{\text{III}}\text{L}$  (excitation at 312 nm).

**Table S1.** The photophysical properties of complex  $\text{Eu}^{\text{III}}\text{L}$

| $\lambda_{\text{max}}$ , nm <sup>[a]</sup>           | $E^{[b]}$ , $10^{-3}$<br>$\text{M}^{-1}\text{cm}^{-1}$ | $\Phi_{\text{Ln}}$ ,<br>% <sup>[c]</sup> | $\tau_{\text{H}_2\text{O}}$ ,<br>ms <sup>[d]</sup> | $\tau_{\text{D}_2\text{O}}$ ,<br>ms <sup>[e]</sup> | $Q^{[f]}$ |
|------------------------------------------------------|--------------------------------------------------------|------------------------------------------|----------------------------------------------------|----------------------------------------------------|-----------|
| 251, 267, 274 <sub>sh</sub> , 312, 322 <sub>sh</sub> | 8.9                                                    | 16.2                                     | 1.07                                               | 1.86                                               | 0.18      |

<sup>[a]</sup>Absorption maxima in  $\text{H}_2\text{O}$  at room temperature; <sup>[b]</sup>The molar extinction coefficient corresponds to the longest absorption wavelength; <sup>[c]</sup>Lanthanide luminescence quantum yields in water solution were determined using  $[\text{Ru}(\text{bpy})_3]\text{Cl}_2$  ( $\Phi = 0.04$  in aerated water<sup>1</sup>); <sup>[d]</sup>Lanthanide luminescence lifetime in water; <sup>[e]</sup>Lanthanide luminescence lifetime in  $\text{D}_2\text{O}$ ; <sup>[f]</sup>The number of coordinated water molecules was calculated using the formula<sup>2</sup>:  $q_{\text{Eu}} = 1.2 \cdot (1/\tau_{\text{H}_2\text{O}} - 1/\tau_{\text{D}_2\text{O}} - 0.25)$ .

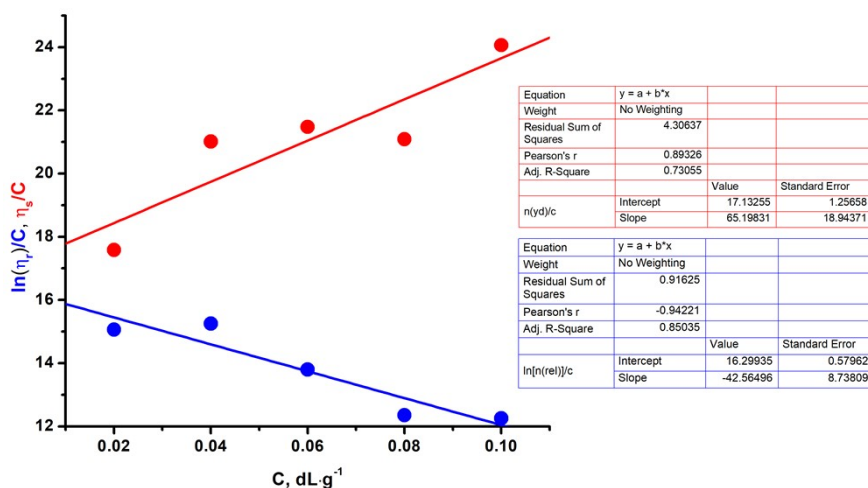

**Figure S3.** The dependency of  $\eta_r/C$  and  $\ln(\eta_s)/C$  on PAAM3 concentration in water.

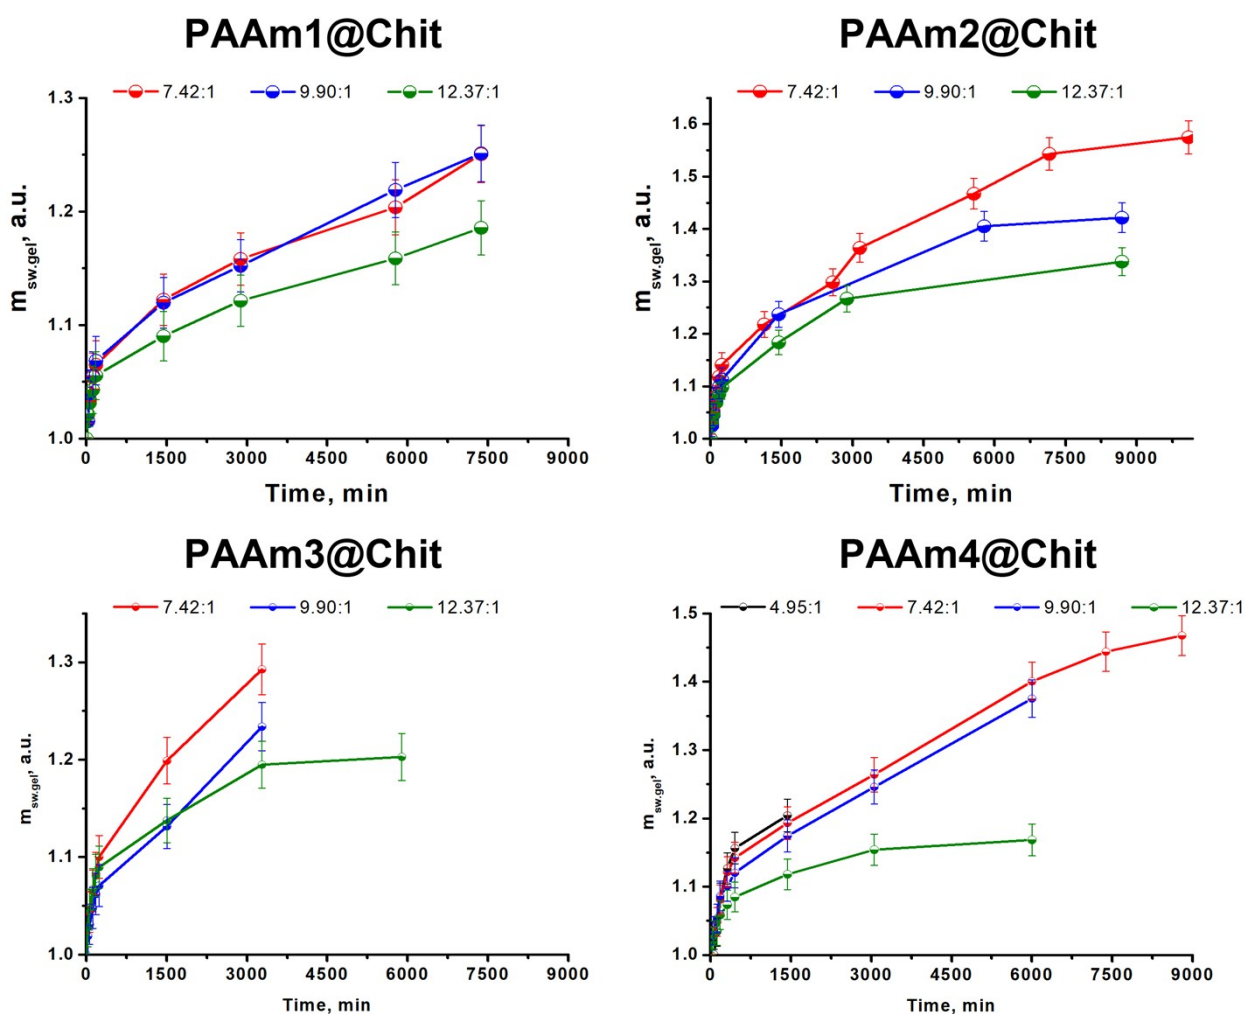

**Figure S4.** The swelling kinetics of PAAM@Chit hydrogels prepared with different molecular weights of PAAM: PAAM1 (0.67 MDa), PAAM2 (1.5 MDa), PAAM3 (5.95-6 MDa), and PAAM4 (10.8-11.4 MDa) where the  $C_{\text{PAAM}}$  is 3.175, 5.925, 5.6, and 6.35  $\text{g}\cdot\text{L}^{-1}$ , respectively.

### Frequency sweep @10 Pa

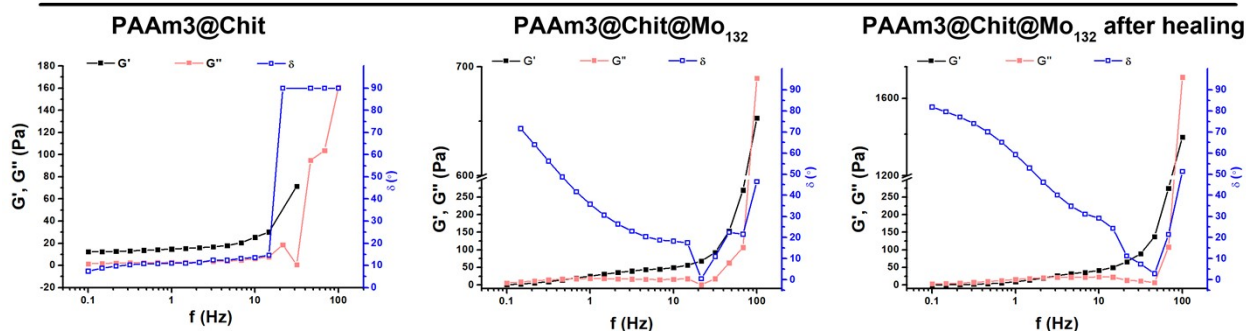

**Figure S5.** The frequency sweep dependency of the storage ( $G'$ ) and loss ( $G''$ ) modules on the hydrogel composition (blank and POM-embedded) and self-healing process measured at 10 Pa shear stress.

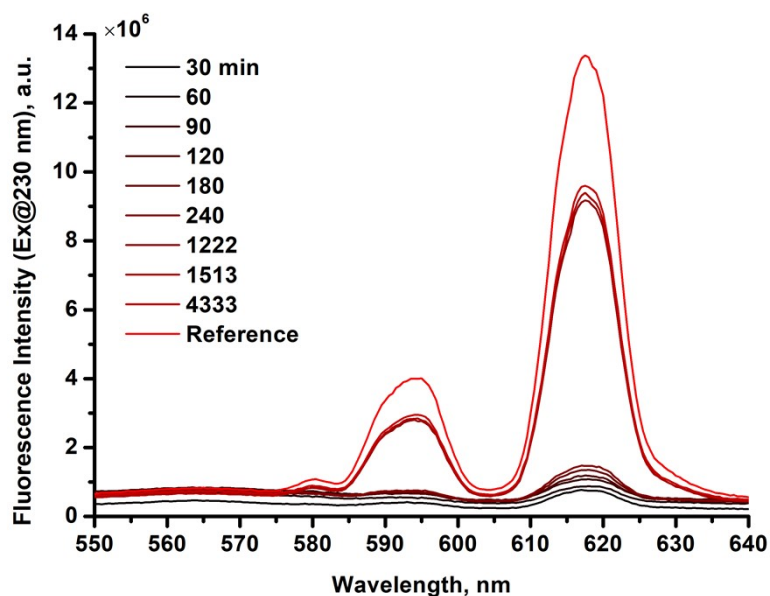

**Figure S6.** The steady-state fluorescence measurement of the aliquot samples from the receiver (solution) during the releasing experiments of PAAm3@Chit@Mo<sub>132</sub> loaded with Eu<sup>III</sup>L. Reference corresponds to the highest possible concentration of the Eu<sup>III</sup>L in the 250 mL in accordance with its moles loaded in hydrogel (i.e.  $4.186 \times 10^{-5} \text{ mol} \cdot \text{L}^{-1}$ ).

### References

- 1 K. Suzuki, A. Kobayashi, S. Kaneko, K. Takehira, T. Yoshihara, H. Ishida, Y. Shiina, S. Oishi and S. Tobita, *Phys. Chem. Chem. Phys.*, 2009, **11**, 9850.
- 2 A. Beeby, I. M. Clarkson, R. S. Dickins, S. Faulkner, D. Parker, L. Royle, A. S. de Sousa, J. A. G. Williams and M. Woods, *J. Chem. Soc. Perkin Trans. 2*, 1999, **2**, 493–504.
